# Supplementary material
Source: PubMed Central journal article supplement (PMC11560819)
Supplement: ajcr0014-4717-f9.pdf [file ajcr0014-4717-f9.pdf]

# Role of EPS8 in prostate cancer treatments

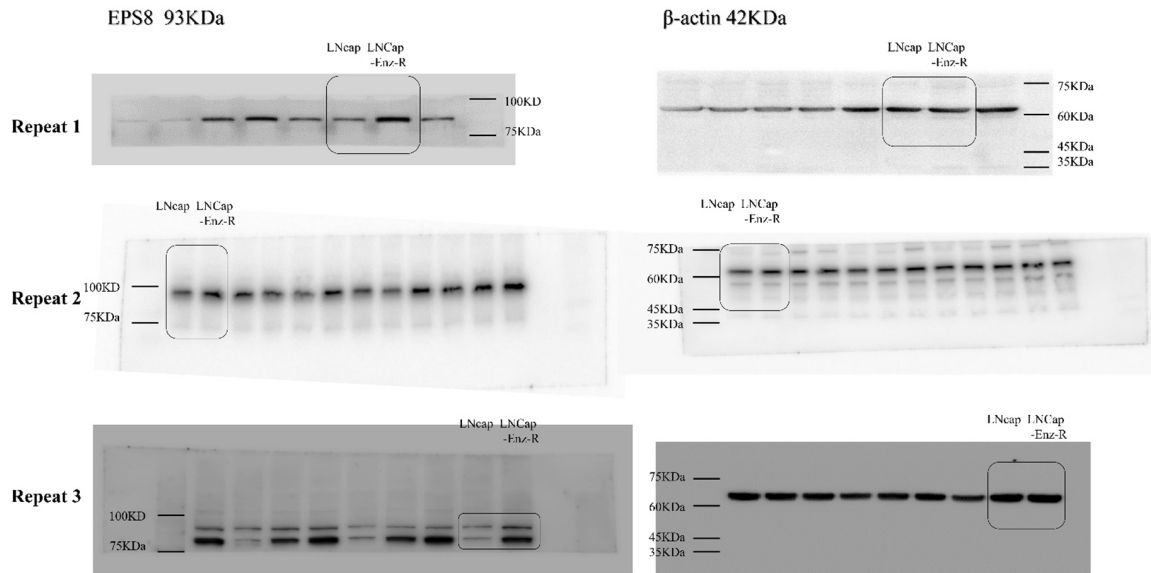

**Figure S1.** Triplicates of the western blot analysis for the expression of EPS8 protein in the LNCaP Enz-R and LNCaP cell lines.

# Role of EPS8 in prostate cancer treatments

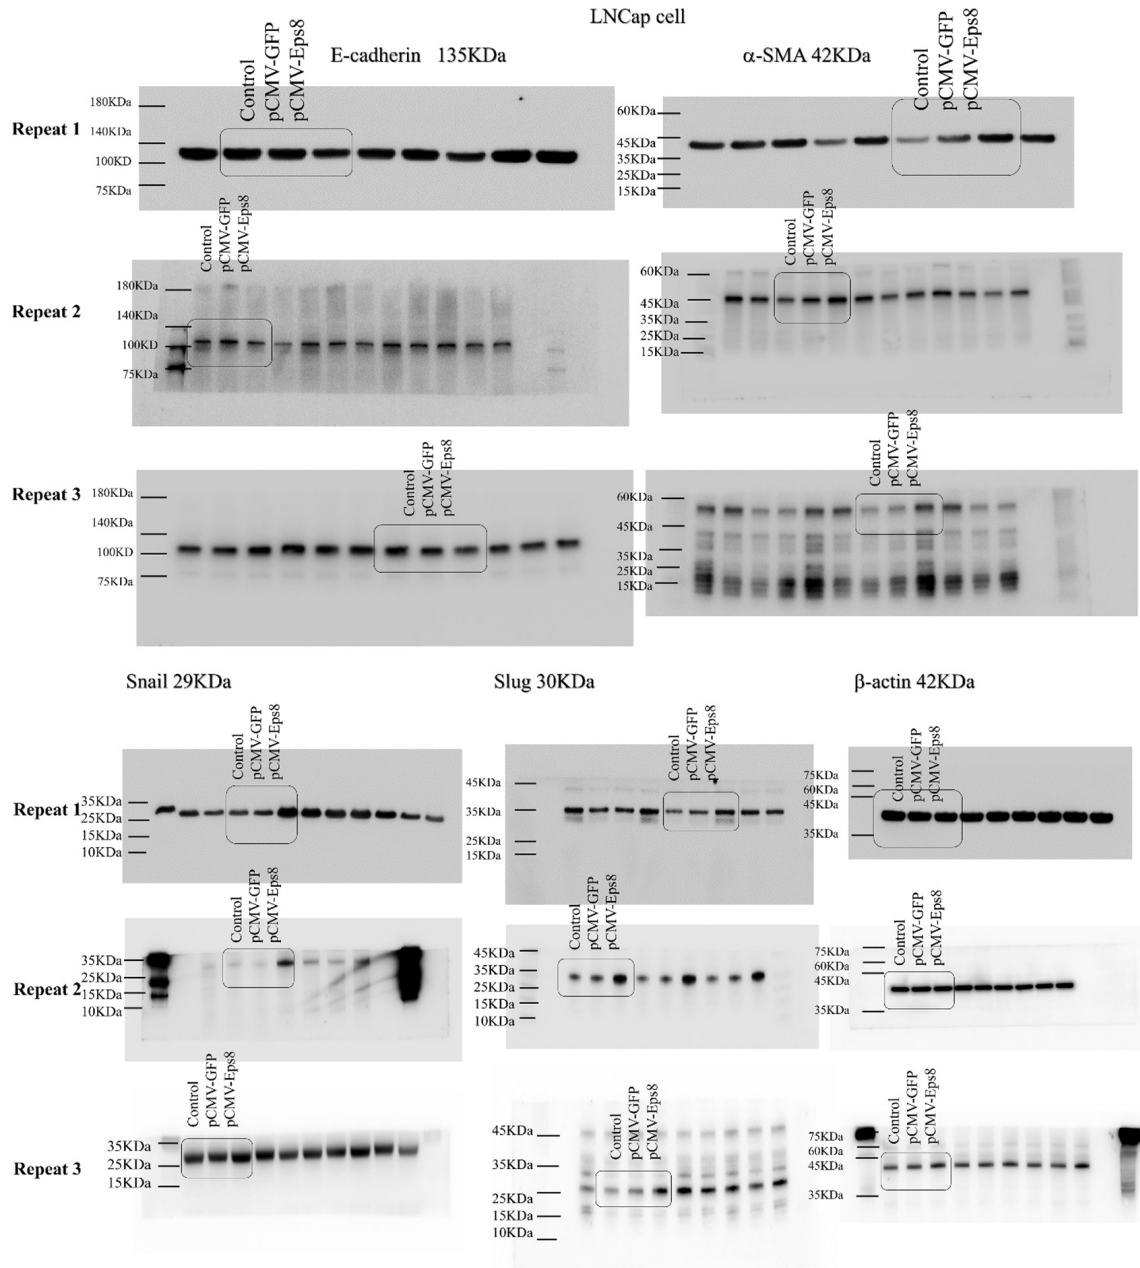

**Figure S2.** Triplicates of the western blot analysis for the EMT markers expression in the LNCaP cell lines transfected with pCMV-EPS8 and pCMV-GFP.

# Role of EPS8 in prostate cancer treatments

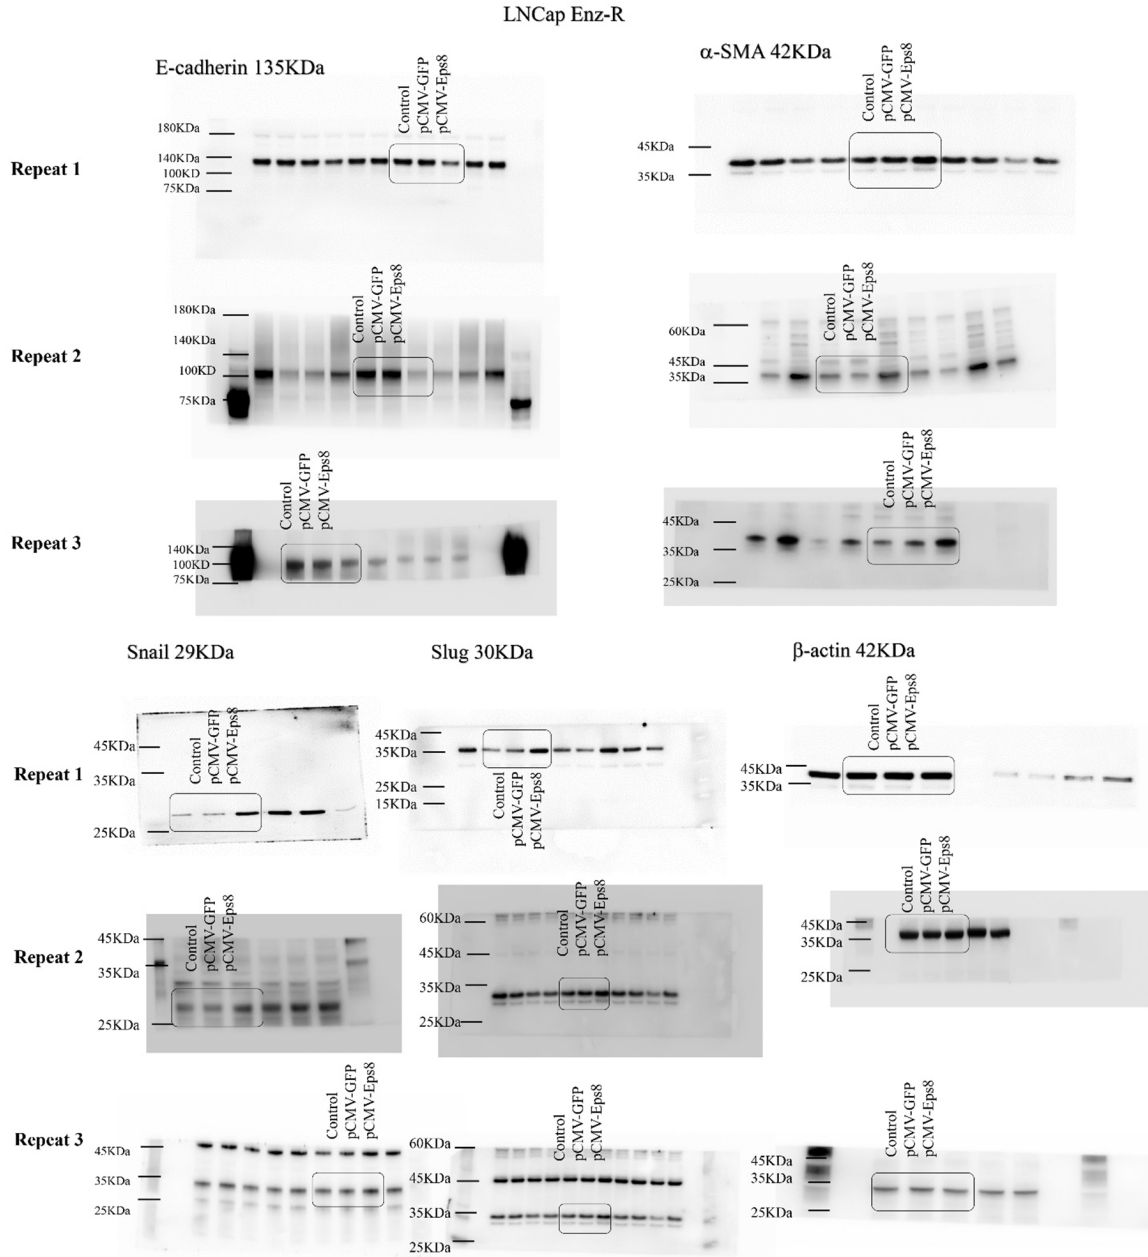

**Figure S3.** Triplicates of the western blot analysis for the EMT markers expression in the LNCap Enz-R cell lines transfected with pCMV-EPS8 and pCMV-GFP.

# Role of EPS8 in prostate cancer treatments

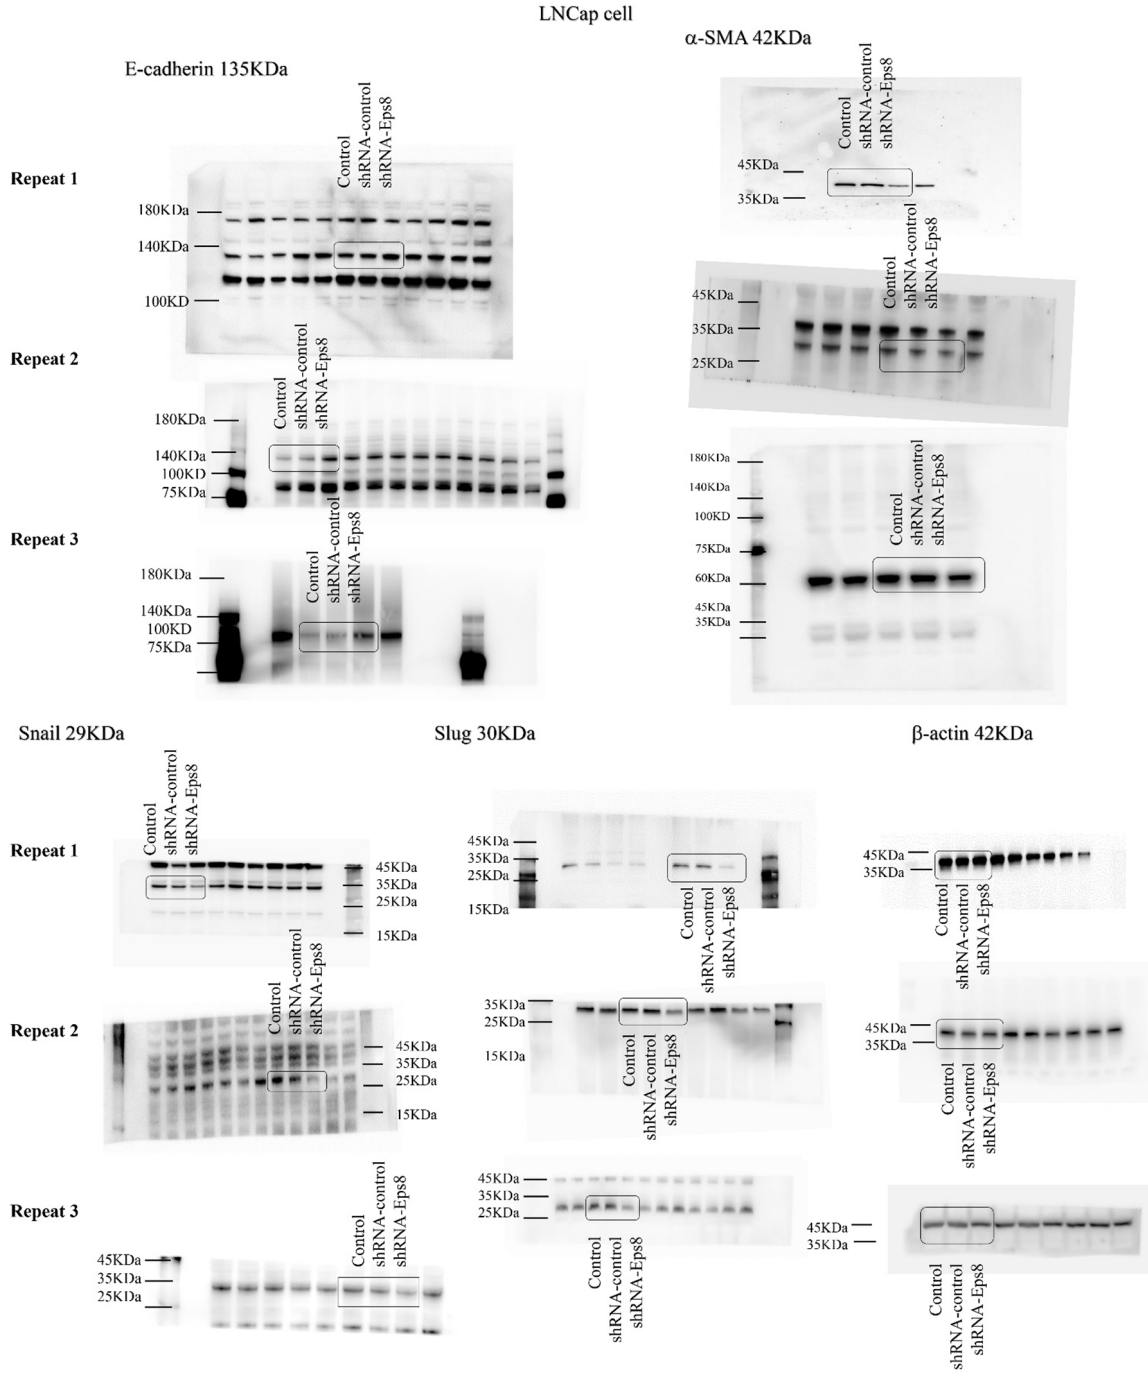

**Figure S4.** Triplicates of the western blot analysis for the EMT markers expression in the LNCap cell lines transfected with shRNA-EPS8 and shRNA-control.

# Role of EPS8 in prostate cancer treatments

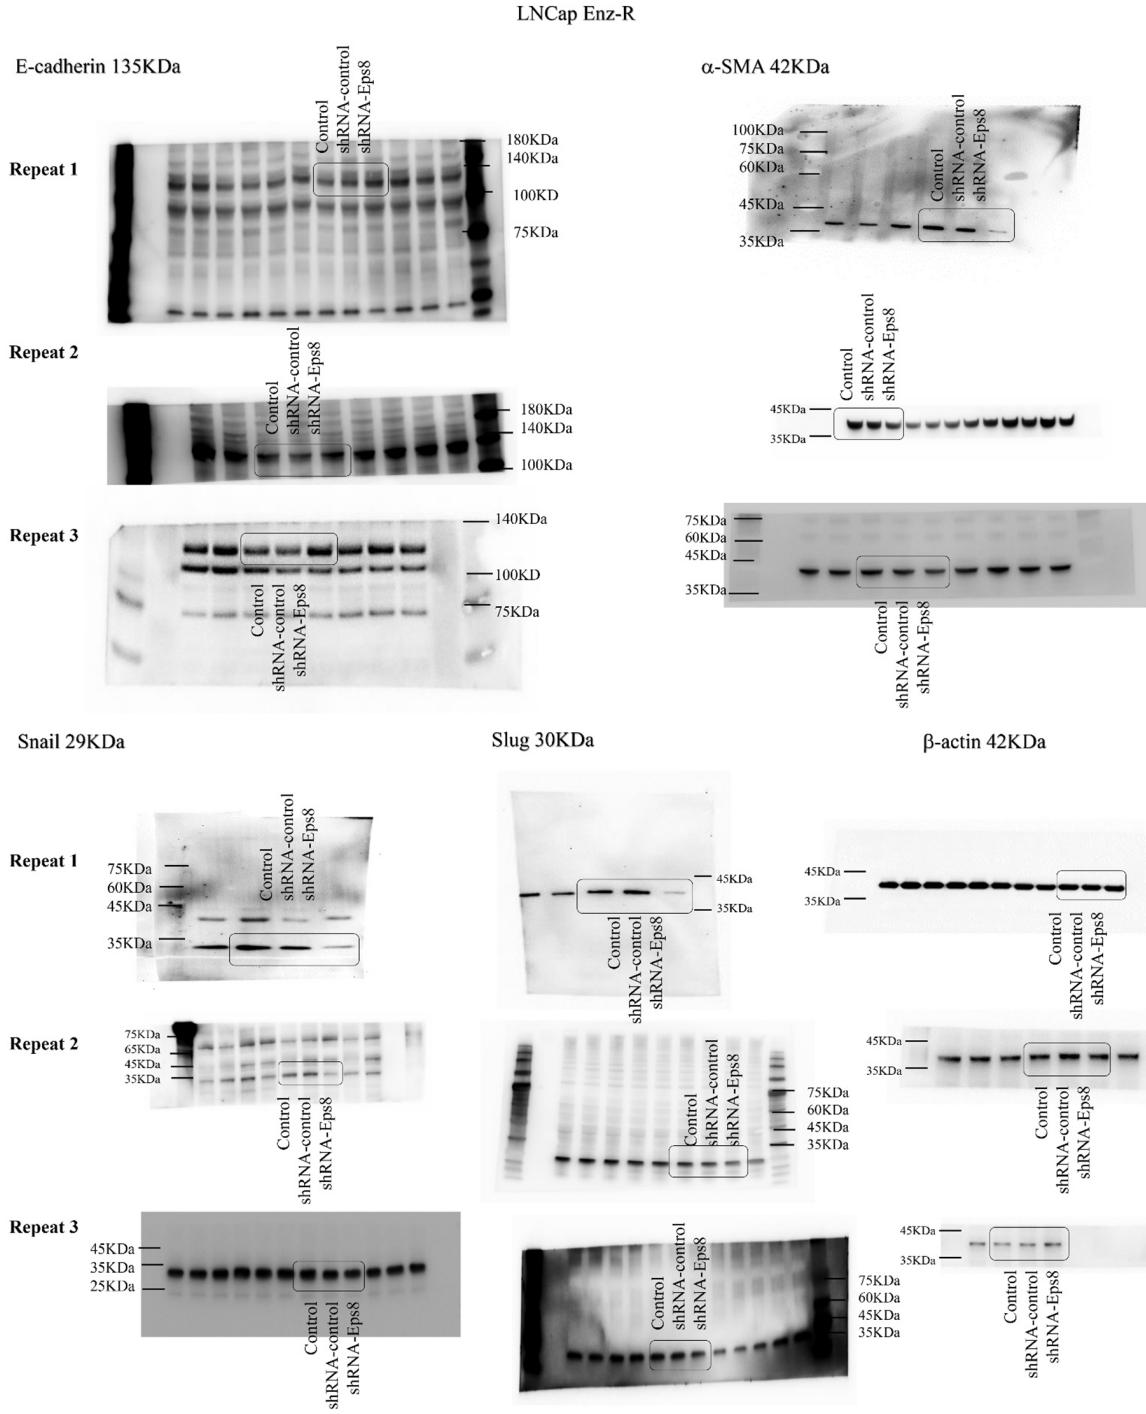

**Figure S5.** Triplicates of the western blot analysis for the EMT markers expression in the LNCap Enz-R cell lines transfected with shRNA-EPS8 and shRNA-control.

# Role of EPS8 in prostate cancer treatments

A

LNCap cell  
E-cadherin 135KDa

pCMV-GFP

Repeat 1

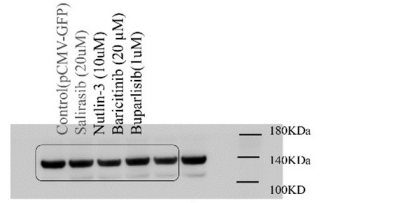

Repeat 2

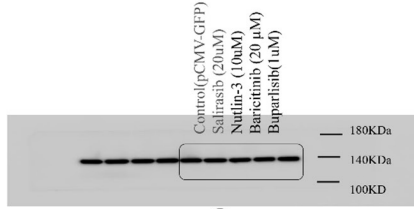

Repeat 3

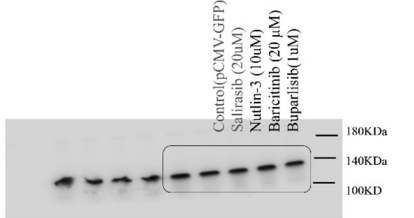

pCMV-Eps8

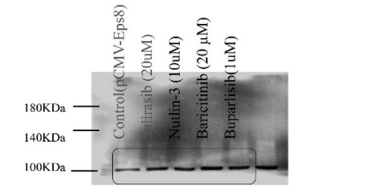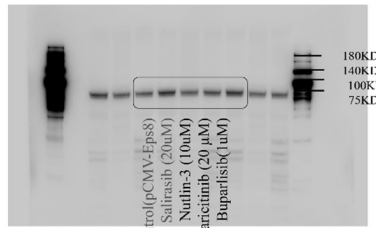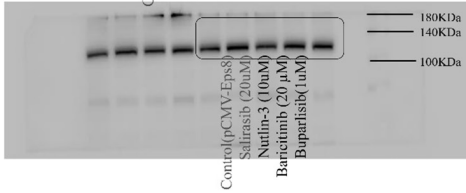

LNCap cell  
 $\alpha$ -SMA 42KDa

pCMV-GFP

Repeat 1

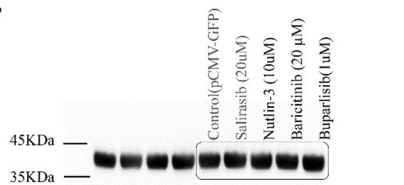

Repeat 2

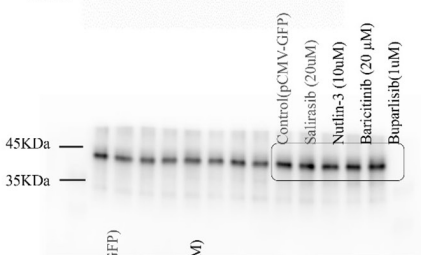

Repeat 3

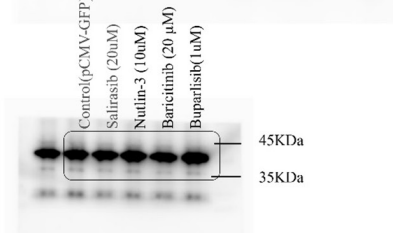

pCMV-Eps8

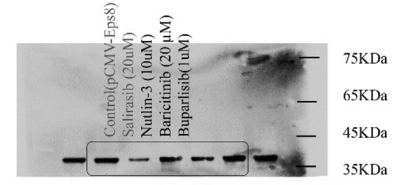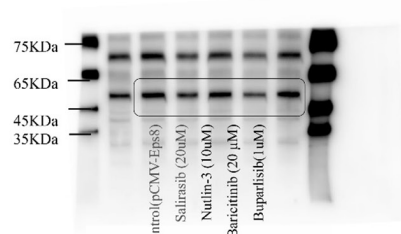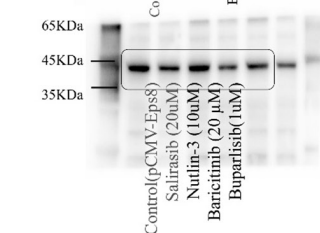



# Role of EPS8 in prostate cancer treatments

B

LNcap cell  
Snail 29KDa

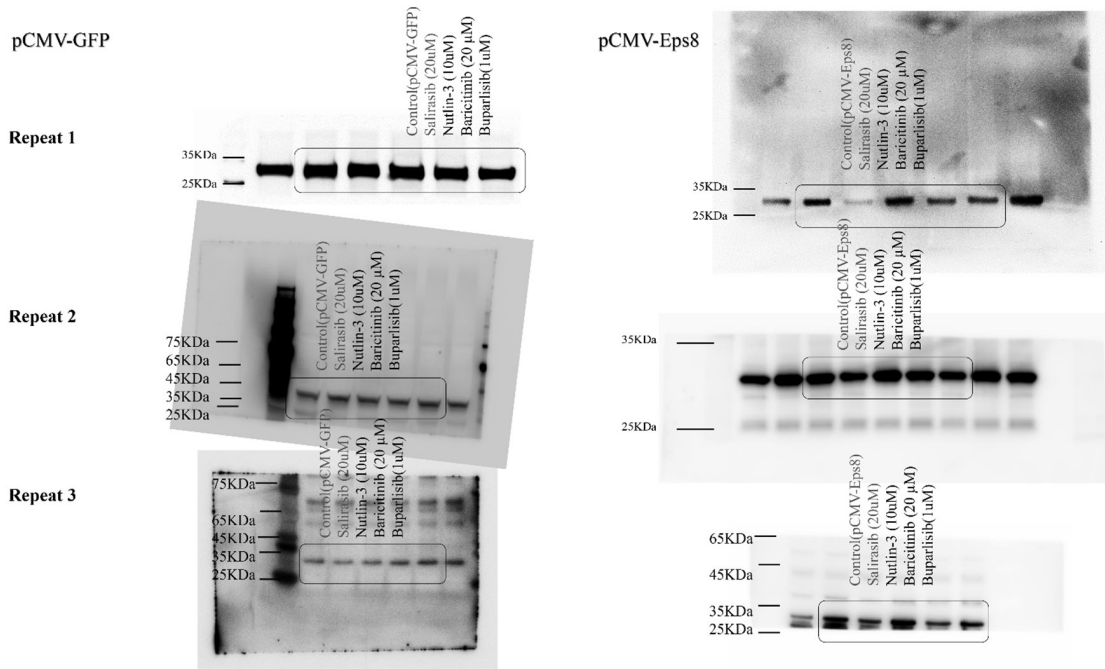

LNcap cell  
Slug 30KDa

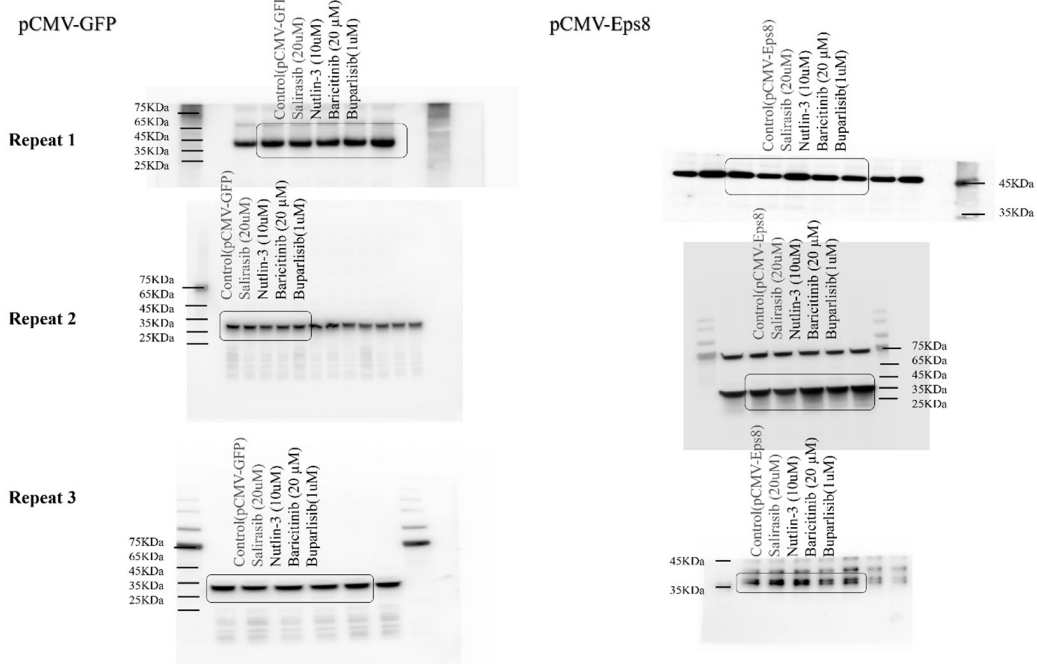

## Role of EPS8 in prostate cancer treatments

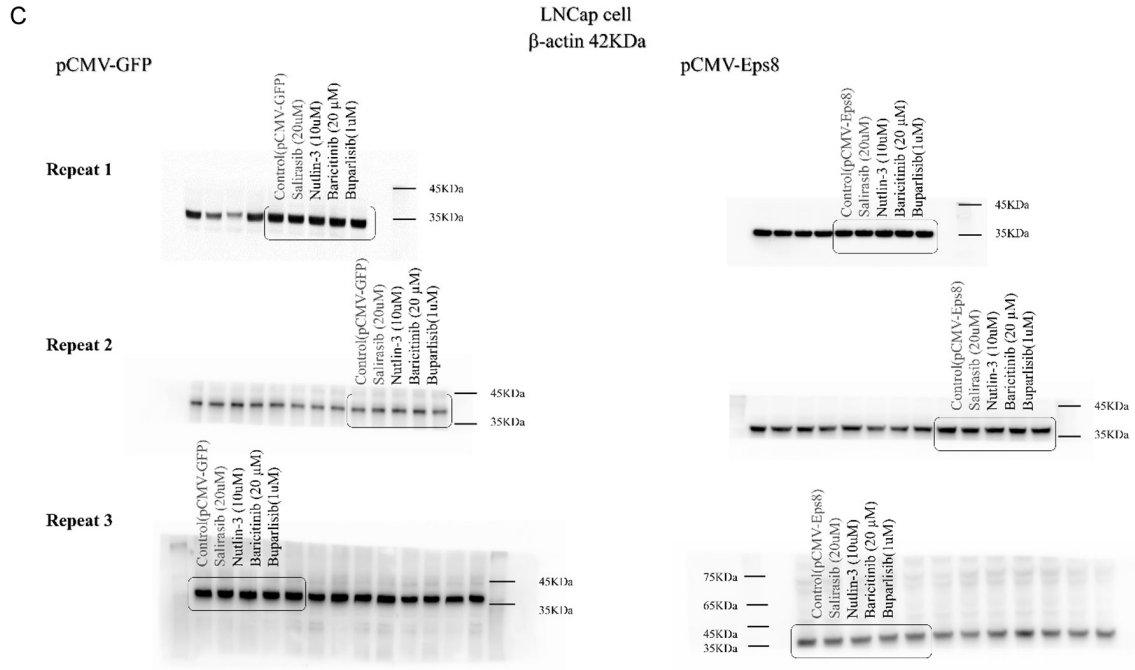

**Figure S6.** A. Triplicates of the western blot analysis for the EMT markers (E-cadherin and  $\alpha$ -SMA) expression in the LNCaP cell lines after administration of Ras/p53/JAK/PI3K signaling inhibitors. B. Triplicates of the western blot analysis for the EMT markers (Snail and Slug) expression in the LNCaP cell lines after administration of Ras/p53/JAK/PI3K signaling inhibitors. C. Triplicates of the western blot analysis for the  $\beta$ -actin expression in the LNCaP cell lines after administration of Ras/p53/JAK/PI3K signaling inhibitors.



# Role of EPS8 in prostate cancer treatments

A

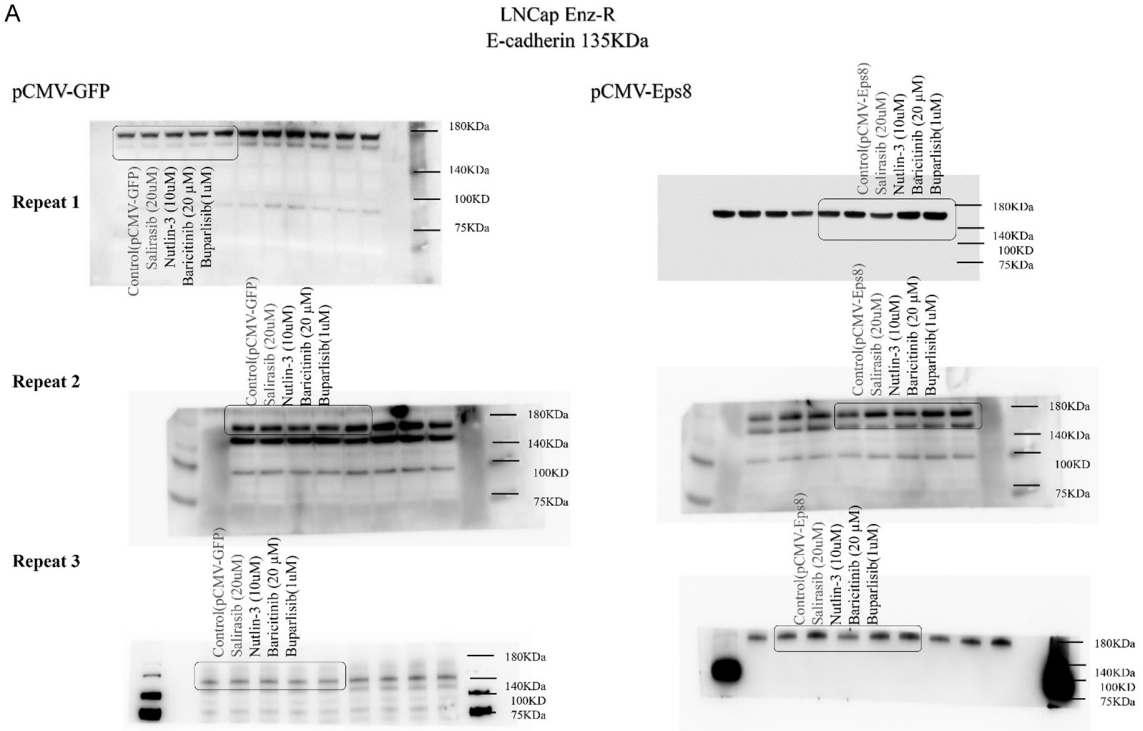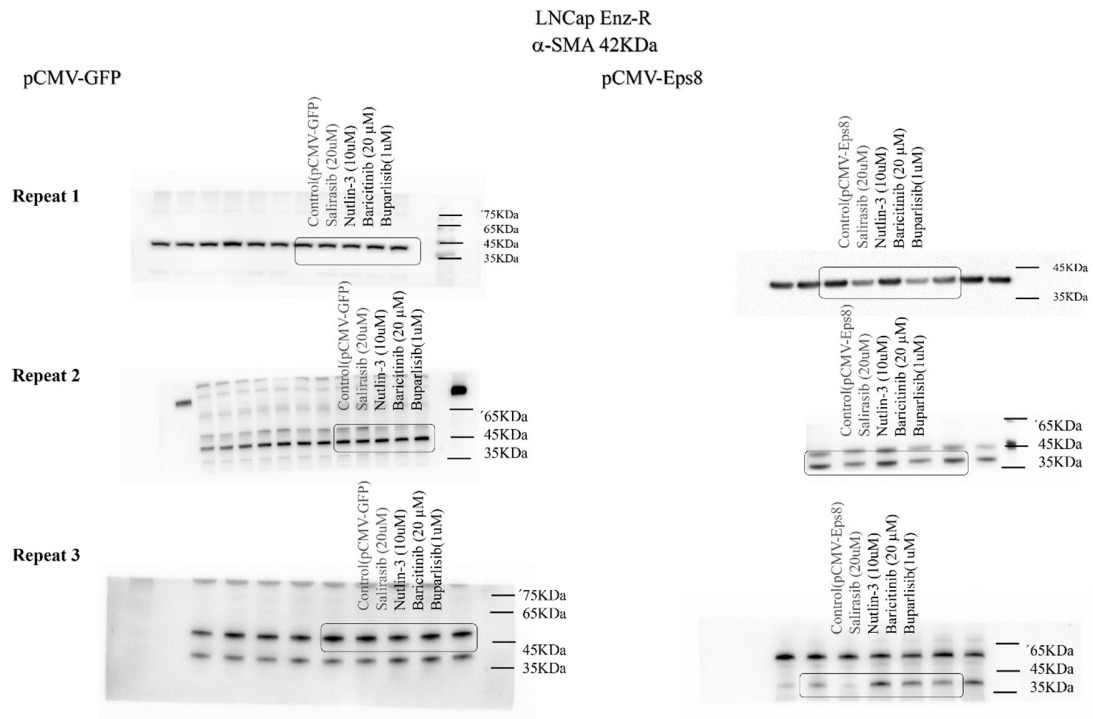

# Role of EPS8 in prostate cancer treatments

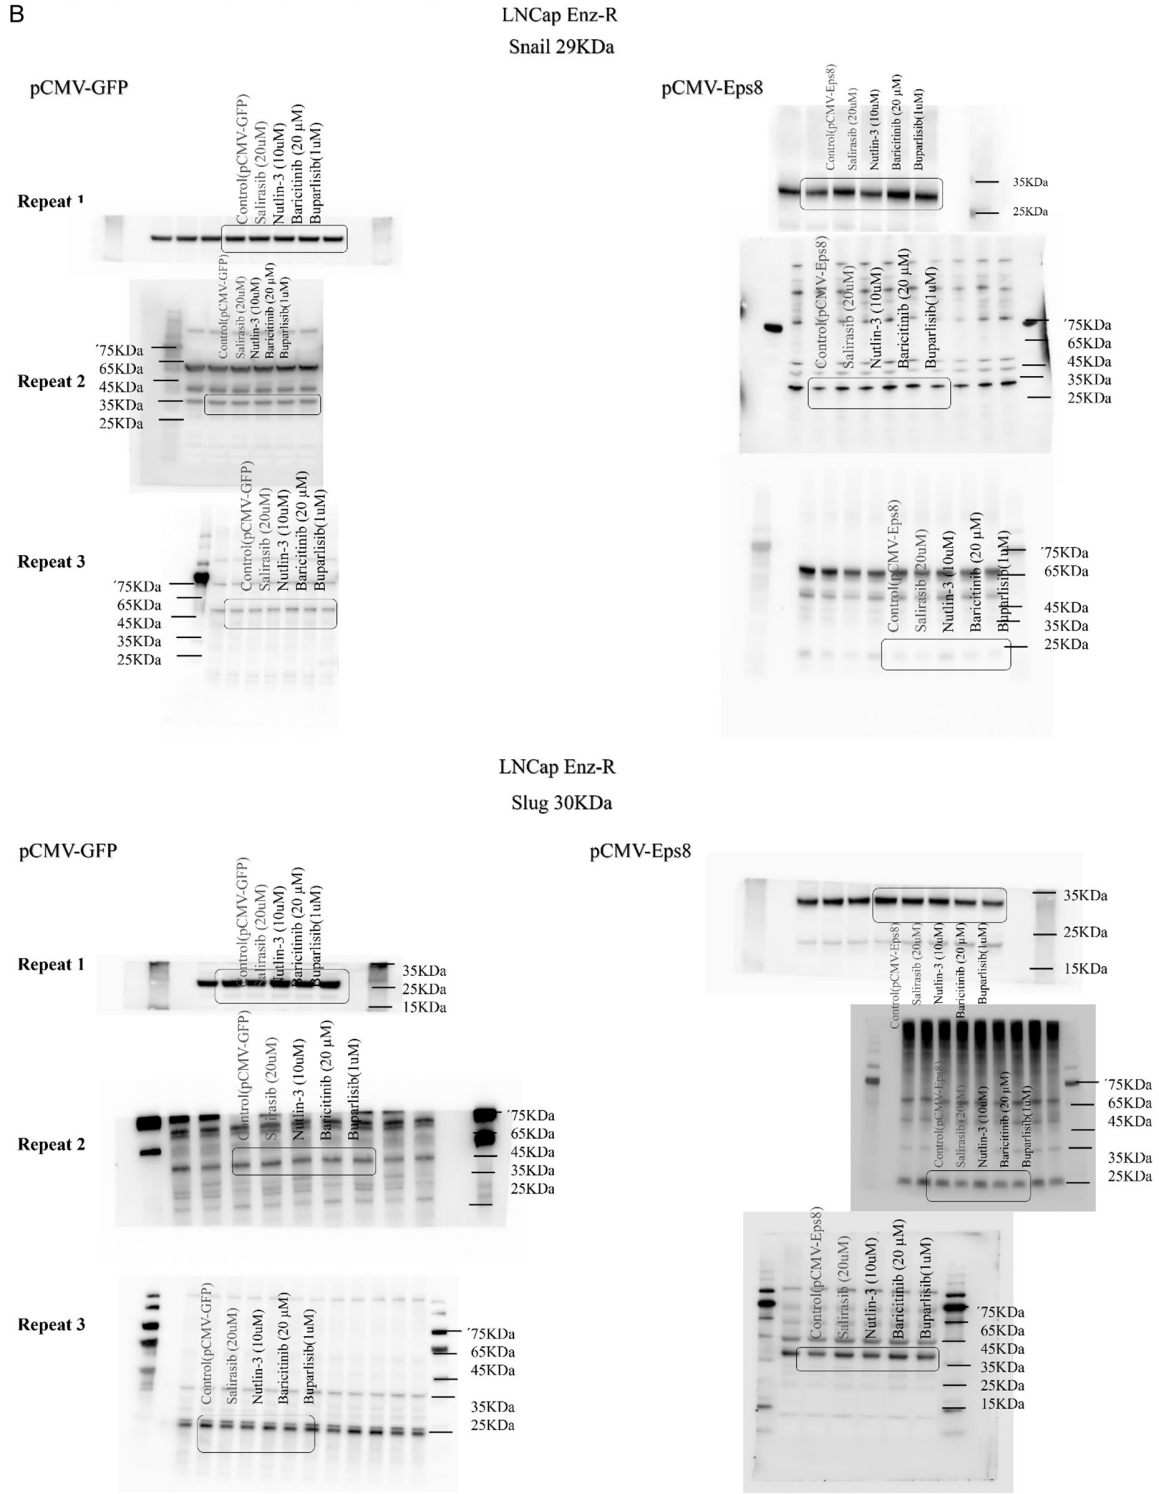

## Role of EPS8 in prostate cancer treatments

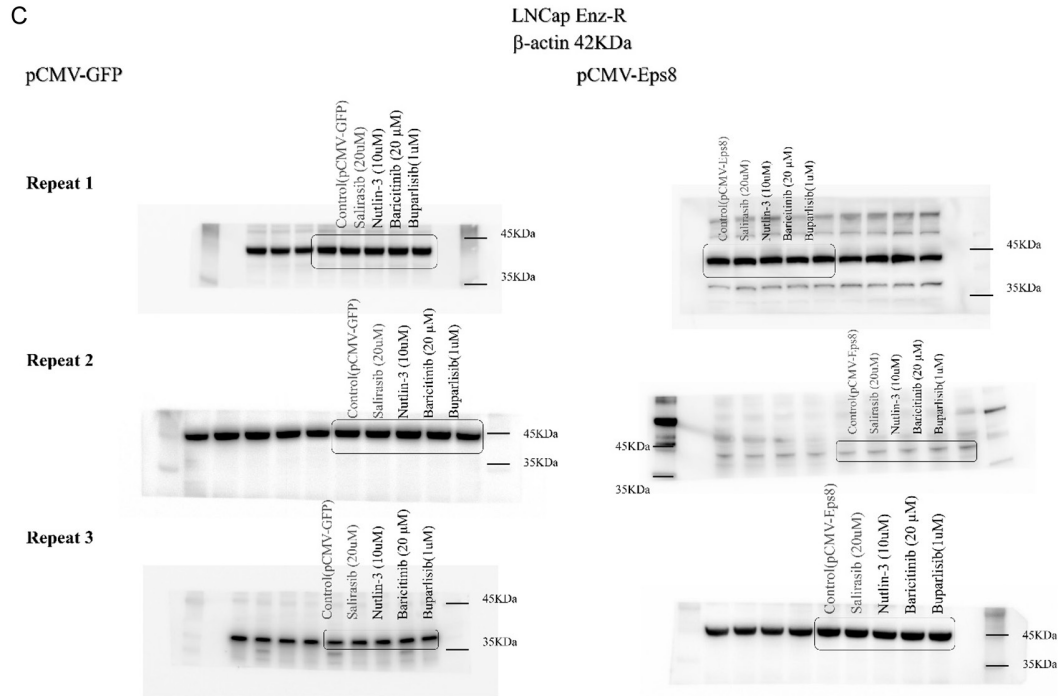

**Figure S7.** A. Triplicates of the western blot analysis for the EMT markers (E-cadherin and  $\alpha$ -SMA) expression in the LNCaP Enz-R cell lines after administration of Ras/p53/JAK/PI3K signaling inhibitors. B. Triplicates of the western blot analysis for the EMT markers (Snail and Slug) expression in the LNCaP Enz-R cell lines after administration of Ras/p53/JAK/PI3K signaling inhibitors. C. Triplicates of the western blot analysis for the  $\beta$ -actin expression in the LNCaP Enz-R cell lines after administration of Ras/p53/JAK/PI3K signaling inhibitors.

## Role of EPS8 in prostate cancer treatments

**Table S1.** Tumor weights of each xenograft

|               | Control | pcDNA-control | pcDNA-EPS8 | shRNA-control | shRNA-EPS8 |
|---------------|---------|---------------|------------|---------------|------------|
| Tumor Weights | 52.40   | 56.00         | 86.80      | 64.00         | 27.60      |
|               | 46.60   | 48.70         | 80.10      | 56.00         | 31.00      |
|               | 50.00   | 56.70         | 80.90      | 35.00         | 33.40      |
|               | 35.80   | 41.30         | 78.70      | 36.00         | 10.00      |
|               | 45.00   | 46.60         | 85.00      | 45.00         | 21.80      |
| Median        | 46.60   | 48.70         | 80.90      | 45.00         | 27.60      |
| P-value       | -       | 0.008*        |            | 0.008*        |            |

Weights of each xenograft are shown. The median tumor weight was greater in the pcDNA-EPS8 and shRNA-control groups compared with the pcDNA-control and shRNA-EPS8 groups. Mann-Whitney U Test, \*P < 0.05.
